# Supplementary material for: Kinetic Analysis for the Catalytic Pyrolysis of Polypropylene over Low Cost Mineral Catalysts
Source: MDPI journal article supplement (doi:10.3390/su132313386), 2021-12-03
Supplement: s1 [file s1]

## Supplementary Information

### Kinetic Analysis for the Catalytic Pyrolysis of Polypropylene over Low Cost Mineral Catalysts

Young-Min Kim <sup>1, †</sup>, Sumin Pyo <sup>2, †</sup>, Hanie Hakimian <sup>2, †</sup>, Kyung Seun Yoo <sup>3, †</sup> and Gwang Hoon Rhee <sup>4</sup>, Young-Kwon Park <sup>2, \*</sup>

<sup>1</sup>Department of Environmental Engineering, Daegu University, Gyeongsan 38453, Korea; ymk@daegu.ac.kr

<sup>2</sup>School of Environmental Engineering, University of Seoul, Seoul 02504, Korea; smpyo2630@gmail.com (S.P.); haniehakimia@gmail.com (H.H.)

<sup>3</sup>Department of Environmental Engineering, Kwanwoon University, Seoul 01897, Korea; yooks@kw.ac.kr

<sup>4</sup>Department of Mechanical and Information Engineering, University of Seoul, Seoul 02504, Korea; ghrhee@uos.ac.kr

\*Correspondence: catalica@uos.ac.kr

†Equal contributed co-first authors.

**Table S1.** GC/MS conditions used in this study.

| GC                       |                                                        |
|--------------------------|--------------------------------------------------------|
| Name                     | Agilent 7890B                                          |
| Split ratio              | 200 : 1                                                |
| GC inlet                 | 300 °C                                                 |
| Oven                     | 40 °C 5 min holding → 20 °C/min → 320 °C 2 min holding |
| Column                   | UA-5 (30 m x 250 µm x 0.25 µm)                         |
| MS                       |                                                        |
| Name                     | Agilent 5977B                                          |
| Scan range               | m/z 30 to 550                                          |
| EM voltage               | 1282                                                   |
| MS Source                | 230 °C                                                 |
| MS Quad                  | 150 °C                                                 |
| Micropyrolyzer (in-situ) |                                                        |
| Name                     | PY-3030iD / Rx-3050TR                                  |
| Catalyst : feedstock     | 5 : 1                                                  |
| Temperature              | 600 °C                                                 |
| Interface                | 320°C                                                  |

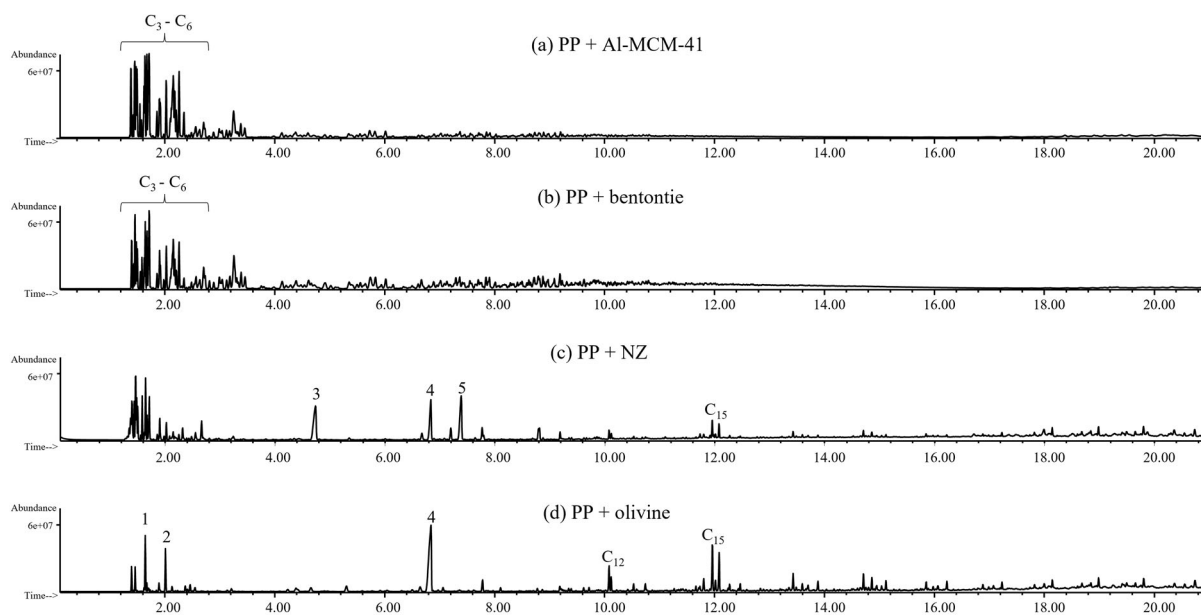

**Figure S1.** Micropyrolyzer-GC/MS chromatograms for catalytic pyrolysis of polypropylene.  
(1: Pentane, 2: Methylpentene, 3: Toluene, 4: Dimethylheptene, 5: p-Xylene)
